# Supplementary material for: Molecular insights into the OGG1 gene, a cancer risk modifier in BRCA1 and BRCA2 mutations carriers
Source: PubMed Central journal article supplement (PMC5041946; doi:10.18632/oncotarget.8272), 2016-03-22
Supplement: oncotarget-07-25815-s001.pdf [file oncotarget-07-25815-s001.pdf]

SUPPLEMENTARY FIGURES AND TABLES

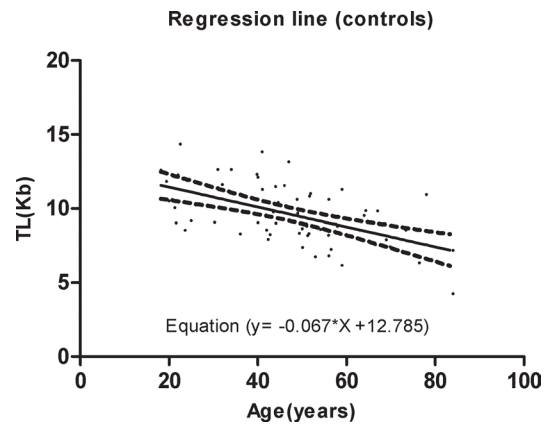

Supplementary Figure S1: TL distribution in peripheral blood leukocytes as a function of age for the control women population (n = 60), measured by HT QFISH. The regression line for control is drawn controls (y= -0.067\* age + 12.785).

Supplementary Table S1: Samples distribution and heterozygous frequency of the *OGGI* variant rs2304277

| FBOC                   | Sample size | Heterozygotes frequency (%) |
|------------------------|-------------|-----------------------------|
| FBOC*                  | 220         |                             |
| FBOC rs2304277         | 81          | 36                          |
| Controls               | 60          |                             |
| Controls rs2304277     | 26          | 43                          |
| <i>BRCA1</i>           | 38          |                             |
| <i>BRCA1</i> rs2304277 | 13          | 36                          |
| <i>BRCA2</i>           | 48          |                             |
| <i>BRCA2</i> rs2304277 | 16          | 34                          |
| BRCAX                  | 74          |                             |
| BRCAX rs2304277        | 26          | 35                          |

No significant differences were found among the groups. \* We have excluded individuals harboring mutations in both *BRCA1* and *BRCA2* genes simultaneously (n=3), none of them harbor the SNP. Hence, the total sample size is 223.

Supplementary Table S2: List of lymphoblastoid cell lines (LCL)

| LCL <sup>a</sup>       | BRCA1 mutation <sup>b</sup>      | Mutation type <sup>c</sup> | Exon | <sup>d</sup> Age | <sup>e</sup> rs2304277 |   |
|------------------------|----------------------------------|----------------------------|------|------------------|------------------------|---|
| 06S179-L <sup>1</sup>  | Wild type                        | -                          | -    | 31               | Wt                     |   |
| 09S797-L <sup>2</sup>  | Wild type                        | -                          | -    | 27               | Wt                     |   |
| 10S889-L <sup>3</sup>  | Wild type                        | -                          | -    | 20               | Wt                     |   |
| 11S66-L <sup>4</sup>   | Wild type                        | -                          | -    | 30               | G>A                    |   |
| 11S534-L <sup>5</sup>  | Wild type                        | -                          | -    | 50               | G>A                    |   |
| 11S954-L               | Wild type                        | -                          | -    | 35               | Wt                     |   |
| 11S375-L               | Wild type                        | -                          | -    | 23               | Wt                     |   |
| 05S1303-L <sup>1</sup> | p.Ala1708Glu                     | Missense                   | 18   | 59               | Wt                     | * |
| 06S1159-L              | c.5123C > A;<br>p.Ala1708Glu     | Missense                   | 18   | 37               | G>A                    |   |
| 10S1202-L              | c.5123C > A;<br>p.Ala1708Glu     | Missense                   | 18   | 53               | Wt                     |   |
| 10S890-L <sup>3</sup>  | c.5123C > A;<br>p.Ala1708Glu     | Missense                   | 18   | 25               | Wt                     | * |
| 11S65-L <sup>6</sup>   | c.5117G > A;<br>p.Gly1706Glu     | Missense                   | 18   | 31               | G>A                    |   |
| 11S67-L <sup>6</sup>   | c.5117G > A;<br>p.Gly1706Glu     | Missense                   | 18   | 34               | Wt                     |   |
| 07S1291-L              | c.3239T > A;<br>p.Leu1080X       | Nonsense/TRC               | 11   | 34               | G>A                    | * |
| 09S798-L <sup>2</sup>  | c.2410C > T; p.Gln804X           | Nonsense/TRC               | 11   | 24               | Wt                     |   |
| 09S546-L               | c.212 + 1G > A; p.?              | Splice/TRC                 | 5    | 42               | G>A                    | * |
| 11S376-L <sup>7</sup>  | c.212 + 1G > A; p.?              | Splice/TRC                 | 5    | 39               | Wt                     | * |
| 11S384-L <sup>7</sup>  | c.212 + 1G > A; p.?              | Splice/TRC                 | 5    | 75               | Wt                     | * |
| 06S1167-L              | c.3331_3334delCAAG;<br>p.Gln1111 | Frameshift/TRC             | 11   | 33               | Wt                     |   |
| 09S491-L               | c.815_824dup10;<br>p.Thr276      | Frameshift/TRC             | 11   | 24               | G>A                    |   |
| 10S1177-L <sup>4</sup> | c.68_69delAG; p.Glu23            | Frameshift/TRC             | 2    | 27               | G>A                    | * |
| 10S44-L                | c.4309delT; p.Ser1437            | Frameshift/TRC             | 13   | 22               | Wt                     | * |
| 11S1004-L <sup>5</sup> | c.981_982delAT;<br>p.Cys328X     | Frameshift/TRC             | 11   | 25               | G>A                    |   |

<sup>a</sup> 1–7 LCL from relatives of the same family (sisters or mother & daughter).

<sup>b</sup> Mutation nomenclature based on GenBank reference sequences NM\_007294.3 with numbering starting at the A of the first ATG, following the journal guidelines ([www.hgvs.org/mutnomen](http://www.hgvs.org/mutnomen)); p.?, unknown protein nomenclature (variant causing skipping of exon 5 of *BRCA1*).

<sup>c</sup> -: Refers to the non-carrier control; TRC: Stands for truncating mutation.

<sup>d</sup> Age of the woman at the time of extraction of the blood sample from which the LCL was established.

<sup>e</sup> G>A indicate the polymorphism (rs2304277).

\* For those cells used in the experiment of telomere shortening along 55 passages.

Supplementary Table S3: Lineal regression analysis in BRCA1/2 mutation carriers

| Dependent variables | Independent variables | $\beta$ coeff | p-values | 95% C.I ((Lower)-(Upper limit)) |
|---------------------|-----------------------|---------------|----------|---------------------------------|
| <i>OGGI</i> mRNA    | SNP                   | -0.591        | 0.027    | ((-1.113)-(-0.070))             |
|                     | Cancer                | 0.148         | 0.549    | ((-0.342)-(0.639))              |
| TL(Kb)              | SNP                   | -1.438        | 0.013    | ((-2.554)-(-0.323))             |
|                     | Cancer                | -0.115        | 0.832    | ((-1.199)-(0.969))              |
| Short telomeres (%) | SNP                   | -0.030        | 0.990    | ((-4.886)-(4.825))              |
|                     | Cancer                | -0.908        | 0.700    | ((-5.625)-(3.810))              |

We included as dependent variables *OGGI* mRNA, TL (Kb) and percentage of short telomeres (%), and as independent variables, the SNP and the cancer status.  $\beta$  coefficients quantify how much the 2 independent variables (*OGGI* SNP and cancer status) modify *OGGI* mRNA levels, TL (Kb) and the percentage of short telomeres and also the modification direction. C.I stands for confidence interval.

**Supplementary Table S4: Gtex information summary, regarding *OGGI* transcriptional down regulation when rs2304277 is present (5 different tissues)**

| Gene Symbol | SNP       | <sup>a</sup> p-value | Tissue                              |
|-------------|-----------|----------------------|-------------------------------------|
| <i>OGGI</i> | rs2304277 | 0.57                 | Cells - EBV-transformed lymphocytes |
| <i>OGGI</i> | rs2304277 | 0.22                 | Uterus                              |
| <i>OGGI</i> | rs2304277 | 0.16                 | Vagina                              |
| <i>OGGI</i> | rs2304277 | 0.45                 | Whole Blood                         |
| <i>OGGI</i> | rs2304277 | 0.023                | Ovary                               |

<sup>a</sup>Nominal eQTL p-values were generated for each SNP-gene pair using a two-tailed t test, testing the alternative hypothesis that the beta (slope of the linear regression model) deviates from the null hypothesis of  $\beta=0$ .

**Supplementary Table S5: Table with information regarding the SNPs within the block of Linkage disequilibrium (LD) >0.8 with the SNP rs2304277**

| SNP in LD>0.8 with rs2304277 |                    |                                 |                     |
|------------------------------|--------------------|---------------------------------|---------------------|
| SNPs                         | Gene               | Location*                       | r <sup>2</sup> (LD) |
| rs3219008                    | <i>OGG1</i>        | intronic                        | 0.86                |
| rs2075747                    | <i>OGG1</i>        | intronic                        | 0.93                |
| rs2072668                    | <i>OGG1</i>        | intronic                        | 0.85                |
| rs1052133                    | <i>OGG1</i>        | Missense/ 3-UTR                 | 0.83                |
| rs4021704                    | <i>OGG1/ CAMK1</i> | intronic                        | 0.98                |
| rs2304277                    | <i>OGG1/ CAMK1</i> | Downstream 3-UTR( <i>OGG1</i> ) | 1.00                |
| rs7609858                    | <i>OGG1/ CAMK1</i> | intronic                        | 0.99                |
| rs6763347                    | <i>OGG1/ CAMK1</i> | intronic                        | 1.00                |
| rs73021455                   | <i>OGG1/ CAMK1</i> | intronic                        | 0.90                |
| rs66482970                   | -                  | -                               | 0.89                |
| rs57081507                   | -                  | -                               | 0.89                |
| rs67055061                   | -                  | -                               | 0.90                |
| rs14204                      | <i>TADA3</i>       | 3'-UTR                          | 0.83                |
| rs6809452                    | <i>TADA3</i>       | intronic                        | 0.88                |
| rs7610826                    | <i>TADA3</i>       | intronic                        | 0.87                |
| rs7618535                    | <i>TADA3</i>       | intronic                        | 0.87                |
| rs7618636                    | <i>TADA3</i>       | intronic                        | 0.88                |
| rs7621556                    | <i>TADA3</i>       | intronic                        | 0.88                |

\*In some cases the SNP can cover more than 1 location depending on the gene isoform. (due to limited space only one gene location is available at the table).
